# Supplementary material
Source: publisher site journal article supplement (https://www.dovepress.com/article/316756)
Supplement: Supplementary file 1 [file get_supplementary_file.php]

**Supplementary figures and figure legends**

**Supplementary figure 1**


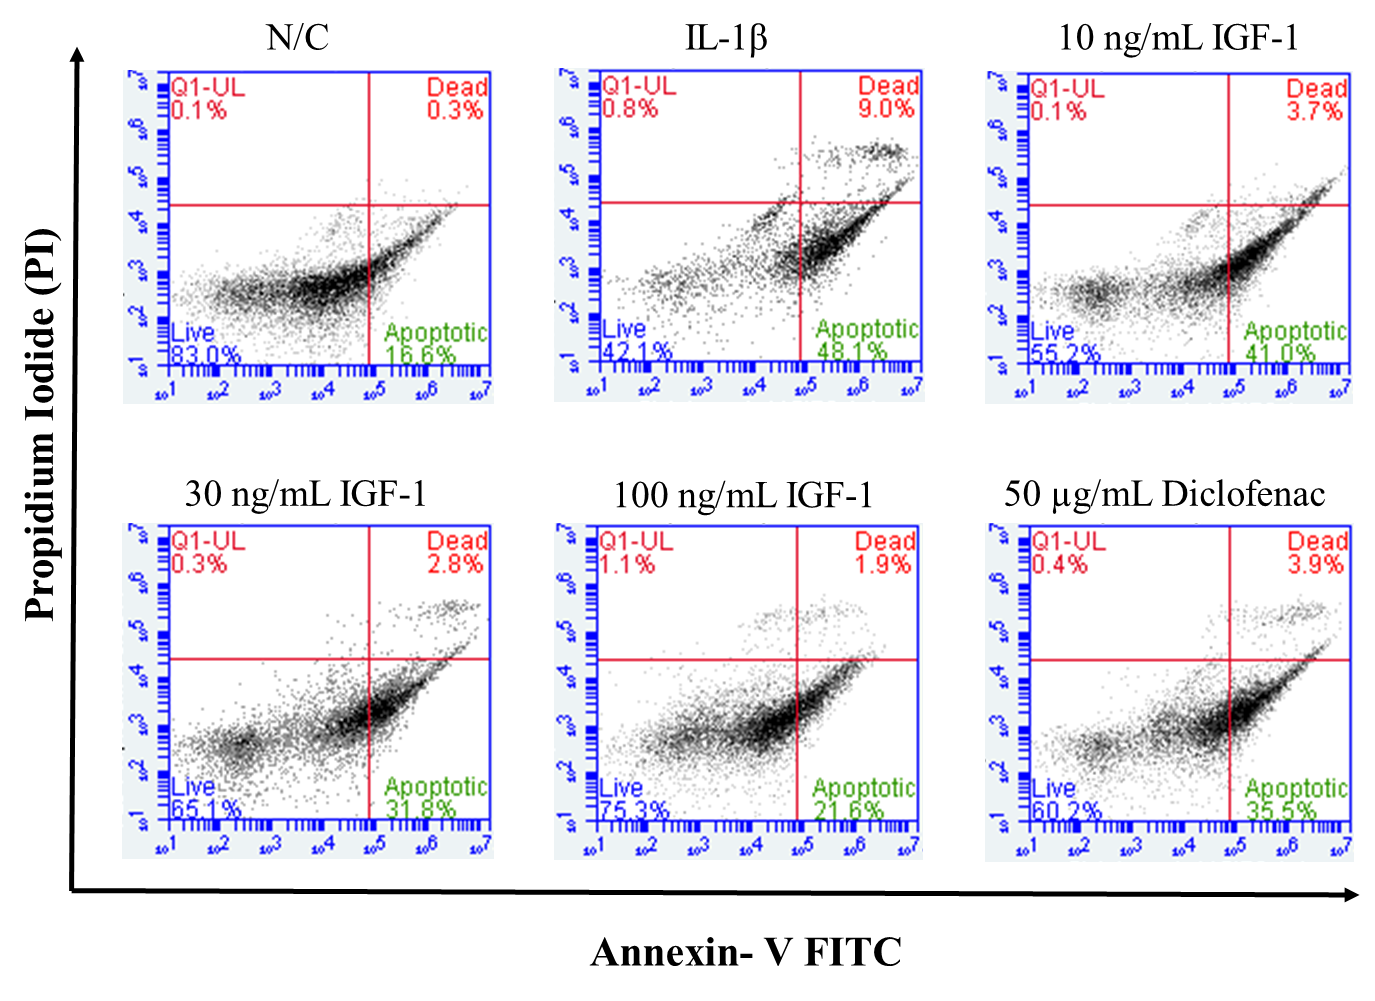


**Supplementary figure 1:**

Evaluations of cell apoptosis of chondrocytes was performed by flow cytometry analysis (BD AccuriTM) according to the Annexin V/PI method (FITC Annexin V apoptosis Detection Kit, BD pharmingen). Cells were plated in a 6-well plate at a density of 5x106 cells/well. Chondrocytes were pretreated with various doses of IGF-1 for 1 h, stimulated with IL-1β for 24 h. The result showed that the rates of apoptosis cells significantly increased in the IL-1β group whereas the IGF-1 dose dependently decreased.

**Supplementary figure 2**


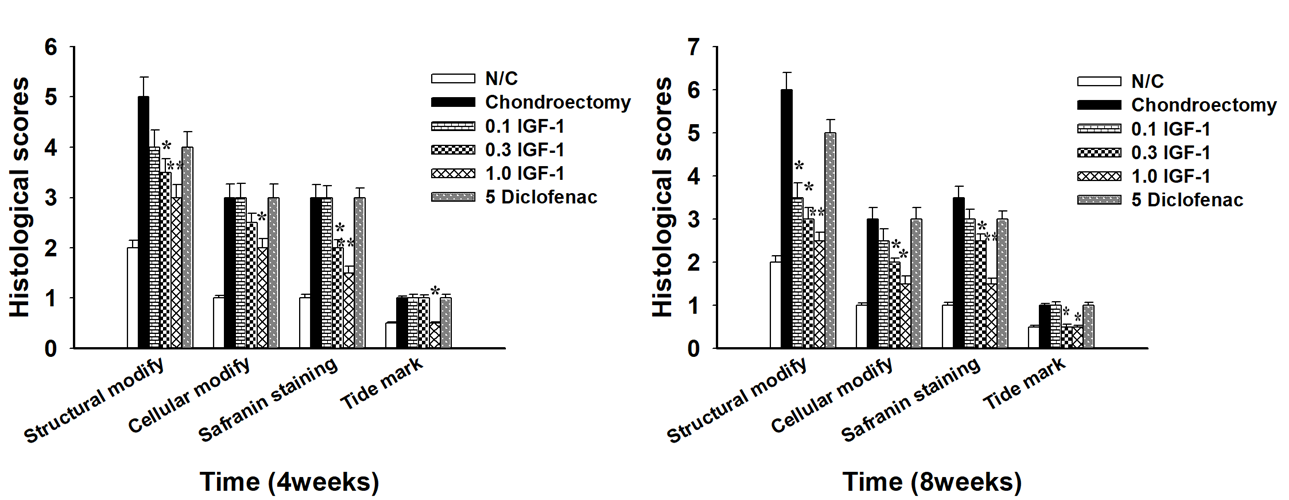


**Supplementary figure 2:**

According to the Mankin score histological evaluation of rabbit femoral articular cartilage was identified as defined in the table 2. The IGF-1 significantly repaired the cell morphology in rabbits defect articular cartilage with smooth surface. Values are the mean ± SD. * *p* < 0.05, and ** *p* < 0.01.
